# Supplementary material
Source: ML conference proceedings conference paper supplement (https://proceedings.neurips.cc/paper_files/paper/2022/hash/5a29c3d172b80bab1238ddc227246c52-Abstract.html)
Supplement: Supplementary file 1 [file 5a29c3d172b80bab1238ddc227246c52-Supplemental-Conference.zip]

Archive with 4 entries (4 files):
- overcast-main.zip
- __MACOSX/._overcast-main.zip
- appendix.pdf
- __MACOSX/._appendix.pdf
